# Supplementary material for: A20-binding inhibitor of NF-κB (ABIN) 2 negatively regulates allergic airway inflammation
Source: PubMed Central journal article supplement — J Exp Med. 2018 Nov 5;215(11):2737–47. doi: 10.1084/jem.20170852 (PMC6219730; doi:10.1084/jem.20170852), 2018-11-05
Supplement: JEM_20170852_sm.pdf [file JEM_20170852_sm.pdf]

## Supplemental material

Ventura et al., <https://doi.org/10.1084/jem.20170852>

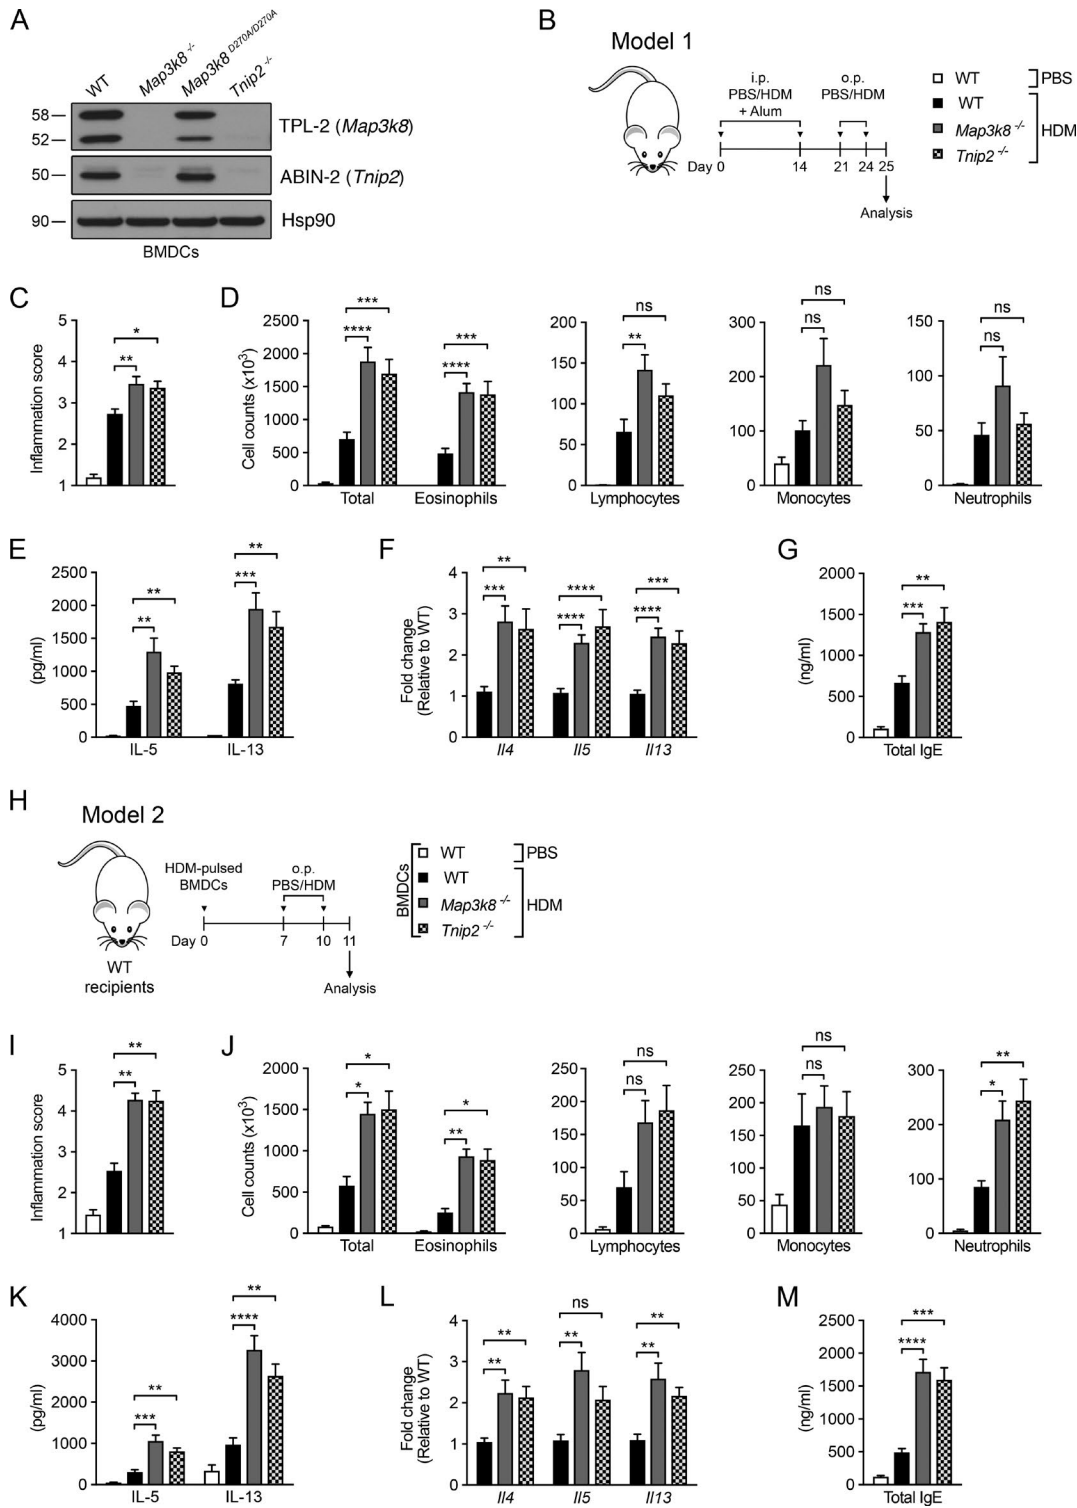

Figure S1. **Deletion of *Tnip2* mimics *Map3k8*<sup>-/-</sup> phenotype in HDM-induced allergy.** (A) Lysates of BMDCs, generated from the indicated mouse genotypes, were immunoblotted for TPL-2 and ABIN-2. Hsp90 was used as loading control. (B) Schematic representation of oropharyngeal HDM sensitization and challenge model in WT, *Map3k8*<sup>-/-</sup>, or *Tnip2*<sup>-/-</sup> mice. o.p., oropharyngeal. (C) Inflammation scores from PBS- and HDM-challenged mice. (D) Differential cell counts in BAL fluids of PBS- and HDM-challenged mice. (E) Cytokine levels in BAL fluid, as assessed by ELISA. (F) Cytokine mRNA expression levels in the lung, measured by qRT-PCR. (G) Total IgE levels in blood serum, as assessed by ELISA. (H) Schematic representation of BMDC adoptive transfer model of HDM-induced airway allergic inflammation (Model 2). o.p., oropharyngeal. (I) Inflammation scores from PBS- or HDM-challenged WT mice after adoptive transfer of HDM-pulsed WT, *Map3k8*<sup>-/-</sup>, or *Tnip2*<sup>-/-</sup> BMDCs. (J) Differential cell counts in BAL fluids of BMDC adoptively transferred mice. (K) Cytokine levels in BAL fluid, as assessed by ELISA. (L) Cytokines mRNA expression levels in the lung, as assessed by qRT-PCR. (M) Total IgE levels in blood serum measured by ELISA. Data in panels C–G and I–M are shown as mean ± SEM and are pooled from three independent experiments (*n* = 10–15 mice/genotype). \*, *P* < 0.05; \*\*, *P* < 0.005; \*\*\*, *P* < 0.001; \*\*\*\*, *P* < 0.0001. Comparisons assessed by Kruskal-Wallis and Dunn-Bonferroni's post hoc test. ns, not significant.

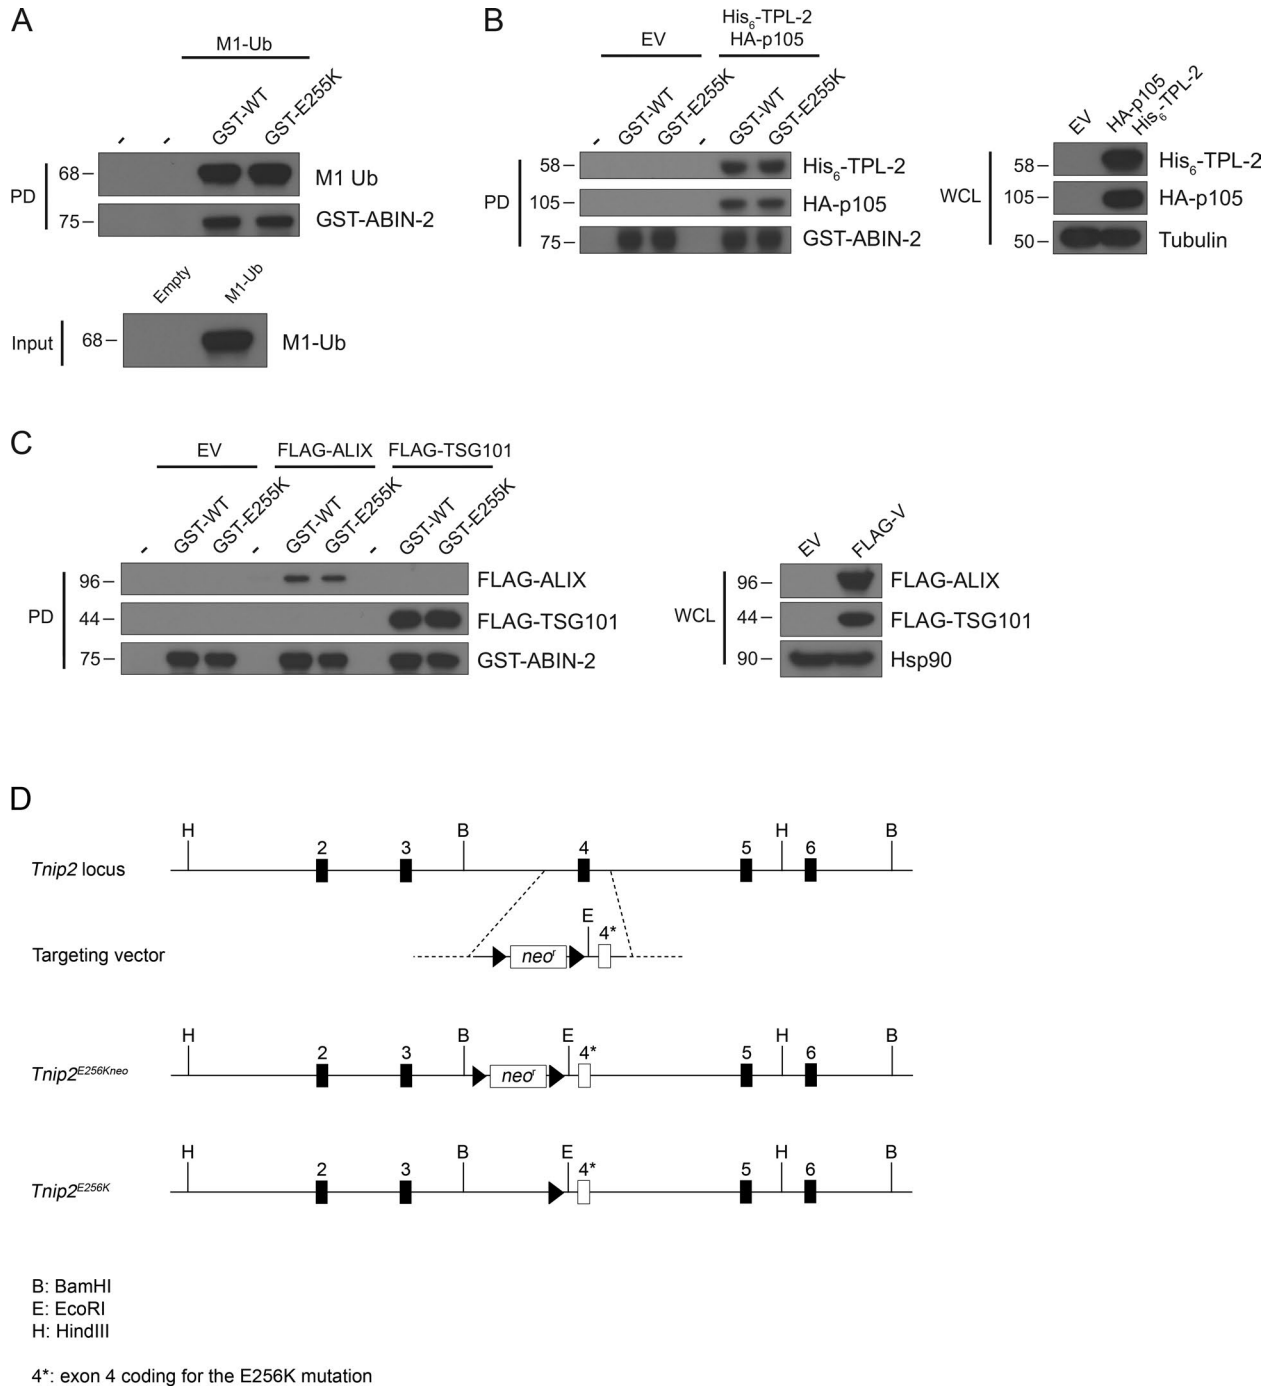

Figure S2. **TNIP2<sup>E255K</sup> mutation impairs ABIN-2 binding to A20.** (A) Interaction of GST-ABIN-2 and GST-ABIN-2<sup>E256K</sup> with M1-Ub chains was determined in pull-down assays. Data are representative of three independent experiments. (B) His<sub>6</sub>-TPL-2 and HA-p105 were transiently coexpressed in HEK293 cells. Interaction of GST-ABIN-2 and GST-ABIN-2<sup>E256K</sup> with His<sub>6</sub>-TPL-2/HA-p105 complexes was determined in pull-down assays. Data are representative of two independent experiments. (C) FLAG-ALIX or FLAG-TSG101 were transiently expressed in HEK293 cells. Interaction of GST-ABIN-2 and GST-ABIN-2<sup>E256K</sup> with these proteins was determined in pull-down assays. Data are representative of two independent experiments. EV, empty vector; PD, pull-down; WCL, whole cell lysate. (D) Schematic representation shows the genomic *Tnip2* locus, the targeting vector, and the mutated *Tnip2*<sup>E256K</sup> allele. Boxes represent exons. The P381-6.1 *Tnip2*<sup>E256K</sup>-targeting construct was generated by Gene Bridges GmbH. The FRT-flanked neomycin resistance cassette (PGK-gb2-neo) was inserted in intron 3. Exon 4 encoding E256 was mutated to generate an E256K coding allele, incorporating a new EcoRI restriction site. The final targeting vector was linearized with Sall and electroporated into C57BL/6 ES cells by PolyGene AG. An embryonic stem cell clone (5C4) bearing the E256K mutation was injected into C57BL/6 blastocysts by standard techniques. Male chimeras were bred to C57BL/6j female mice, and progeny was screened by digestion of genomic DNA with HindIII or BamHI, followed by Southern blotting with 5'- and 3'-probes, respectively. This allowed the targeted *Tnip2* alleles to be discriminated from the endogenous *Tnip2* allele. *Tnip2*<sup>E256K/E256K</sup> mice were then crossed with FlpE<sup>+</sup> mice for removal of the PGK-gb2-neo sequence.

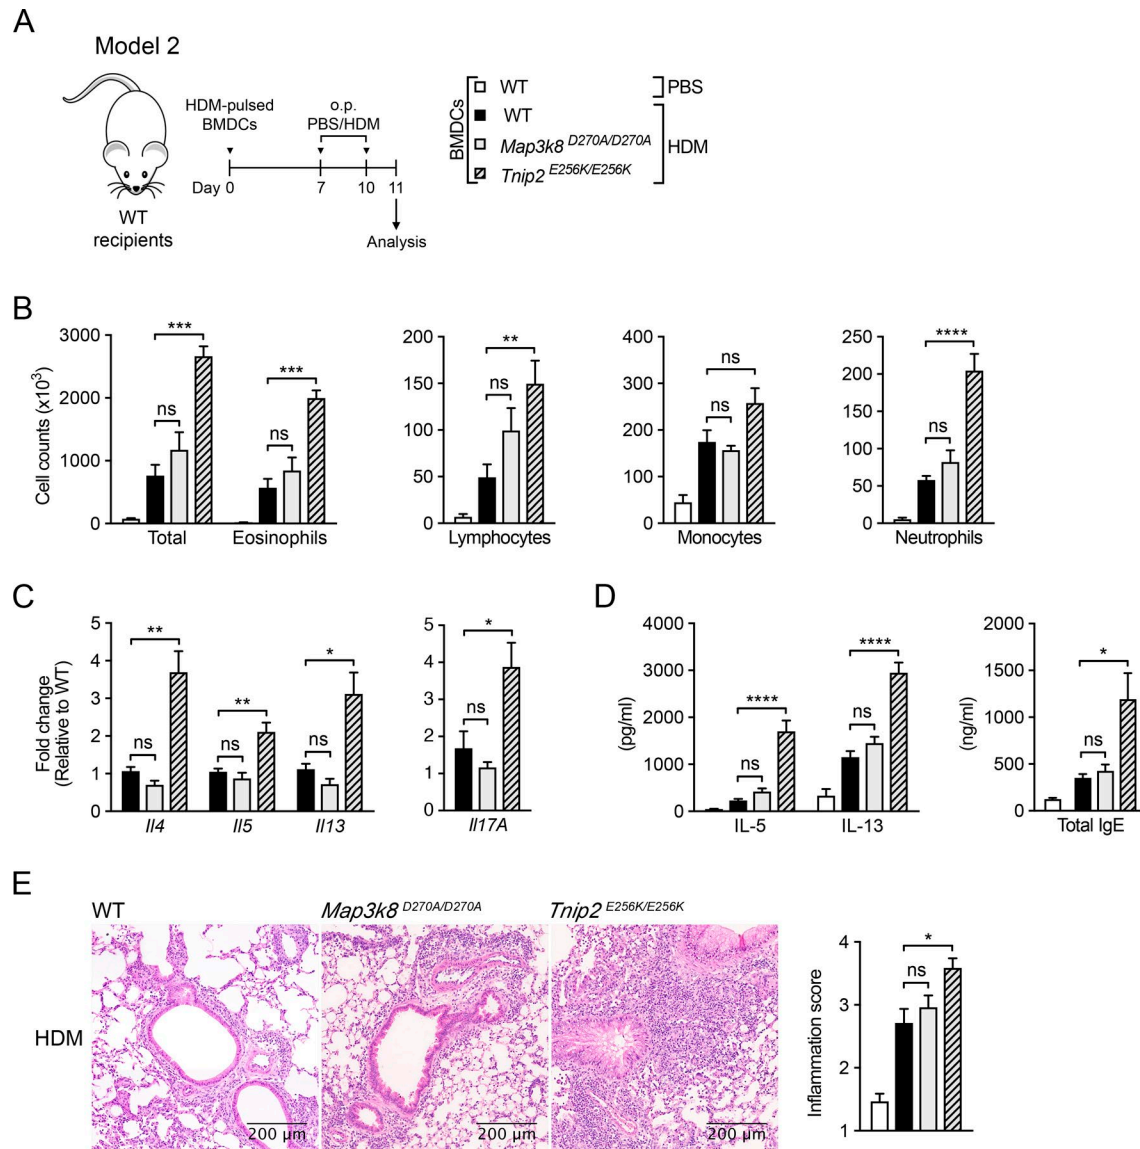

**Figure S3. HDM-pulsed *Tnfp2*<sup>E256K/E256K</sup> BMDCs induce a severe airway allergic response.** (A) Schematic representation of the BMDC adoptive transfer model of HDM-induced airway allergic inflammation (Model 2). o.p., oropharyngeal. (B) Differential cell counts in BAL fluids from PBS- or HDM-challenged WT mice after adoptive transfer of HDM-pulsed WT, *Map3k8*<sup>D270A/D270A</sup>, or *Tnfp2*<sup>E256K/E256K</sup> BMDCs. (C) Cytokine mRNA expression levels in the lung, as assessed by qRT-PCR. (D) Total IgE levels in blood serum, IL-5, and IL-13 levels in BAL fluid, as assessed by ELISA. (E) H&E-stained lung sections (left panel) and inflammation scores (right panel) from PBS and HDM-challenged BMDC adoptively transferred mice. Data in panels B–E are shown as mean  $\pm$  SEM and are pooled from three independent experiments ( $n = 9$ – $11$  mice/genotype). \*,  $P < 0.05$ ; \*\*,  $P < 0.005$ ; \*\*\*,  $P < 0.001$ ; \*\*\*\*,  $P < 0.0001$ . Comparisons assessed by Kruskal-Wallis and Dunn-Bonferroni's post hoc test. ns, not significant.
